# Supplementary material for: Isolated/interacting Au islands on TiO2NTs for the switching photocatalytic/photoelectrocatalytic degradation of refractory organic pollutants in wastewater
Source: Royal Society of Chemistry journal article supplement (doi:10.1039/c8ra09160a), 2019-01-01
Supplement: c8ra09160a1.pdf [file c8ra09160a1.pdf]

## Supporting Information

### Isolatedly/interactedly Au islanded TiO<sub>2</sub> NTs for a switch of photocatalytic/photoelectrocatalytic degradation of refractory organic pollutants in wastewater

**Dan Zhang<sup>a</sup>, Baohui Wang<sup>a,\*</sup>, Jiaqi Wang<sup>b</sup>, Hongming Wang<sup>b</sup>, Shixu Zhang<sup>b</sup>, Di Gu<sup>b,\*</sup>**

<sup>a</sup> Institute of New Energy Chemistry and Environmental Science, College of Chemistry and Chemical Engineering, Northeast Petroleum University, Daqing 163318, PR China

<sup>b</sup> Provincial Key Laboratory of Oil & Gas Chemical Technology College of Chemistry and Chemical Engineering, Northeast Petroleum University, Daqing 163318, PR China

#### 1. Preparation of the two-step TiO<sub>2</sub> NTs

Titanium sheets (20mm×10mm×0.2mm) were ultrasonically cleaned by acetone, absolute ethyl alcohol, diluted hydrochloric acid and deionized water inturn for 15min and dried in air. Later, the cleaned Ti sheet was used as the anode and a Pt sheet (20 mm × 10 mm × 0.2 mm) was used as the cathode were put into the organic electrolyte which was made up with 0.5 wt-% NH<sub>4</sub>F and 2 vol-% deionized water in ethylene glycol.

The first anodization was carried out at 60 V for 30 min (one-step TiO<sub>2</sub> NTs), after which the one-step TiO<sub>2</sub> NTs were immediately ultrasonically cleaned in deionized water, until the oxide film formed on the surface of the titanium sheet was completely cleaned, living glossy substrate with ordered hexagonal pattern. The second anodization was subsequently carried out under the same organic electrolyte at 30V for 30 min (the two-step TiO<sub>2</sub> NTs), washed by deionized water, and dried in a N<sub>2</sub> stream. In the end, the TNTs samples were calcined in muffle furnace at 450 °C for 1 h with a heating rate of 5 °C /min to transform the amorphous phase of TiO<sub>2</sub> to the anatase phase.

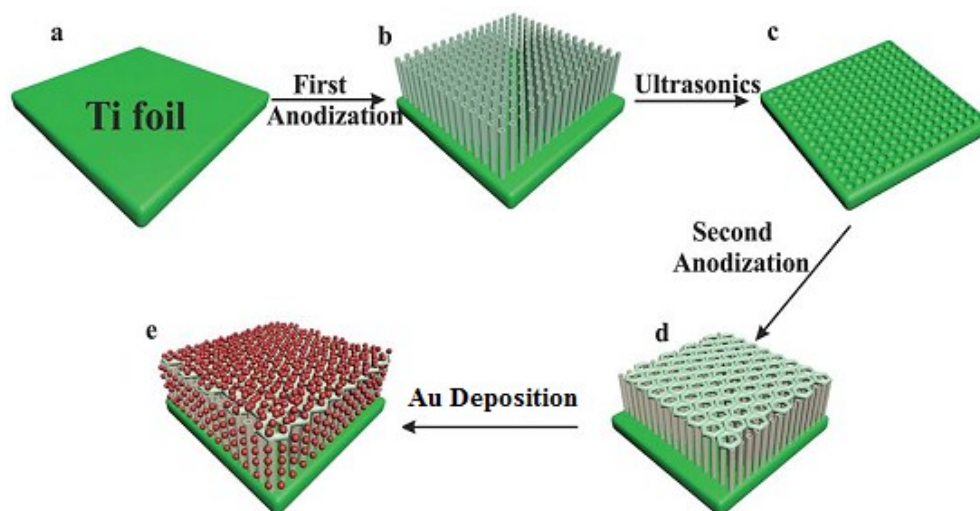

Fig.S1 Two-step anodization processes for fabrication of 2-step  $\text{TiO}_2$  NTs and photocatalytic reduction for decoration of Au.

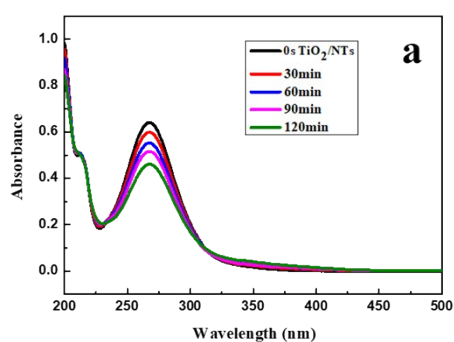

Fig.S2

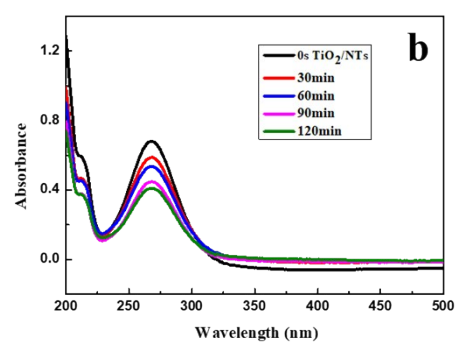

Fig.S3

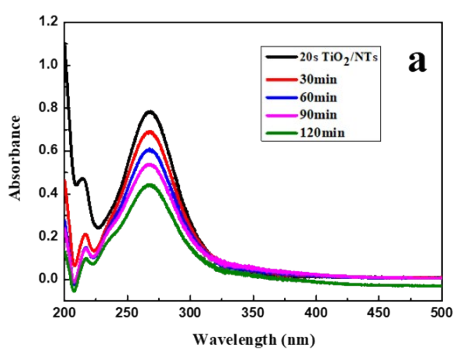

Fig.S4

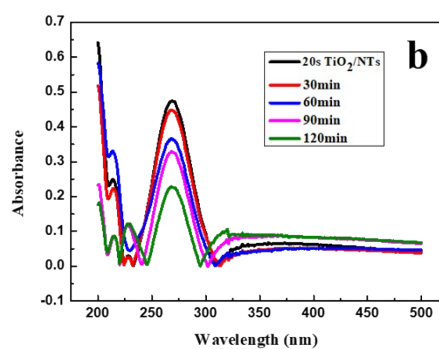

Fig.S5

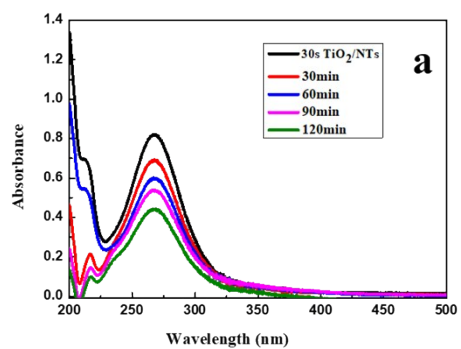

Fig.S6

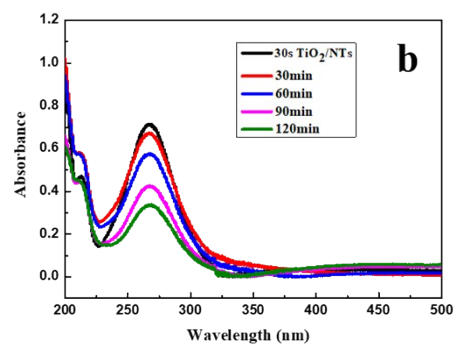

Fig.S7

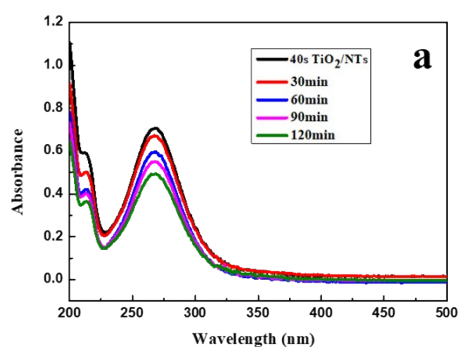

Fig.S8

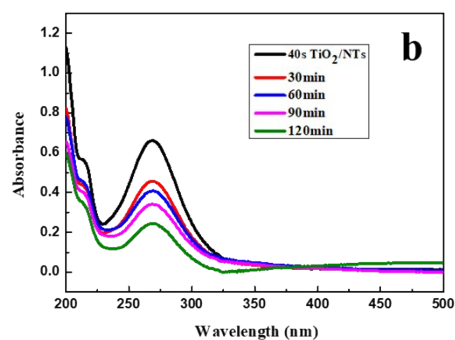

Fig.S9

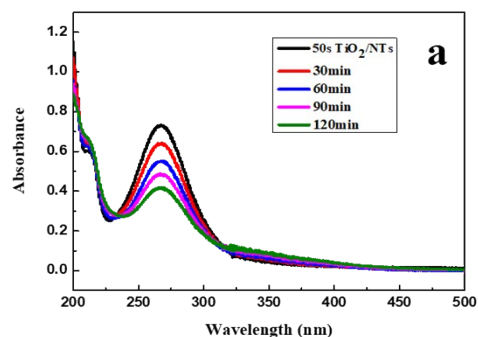

Fig.S10

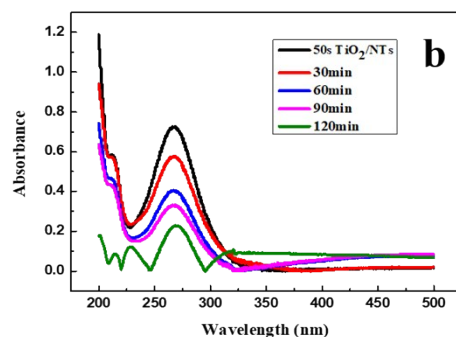

Fig.S11

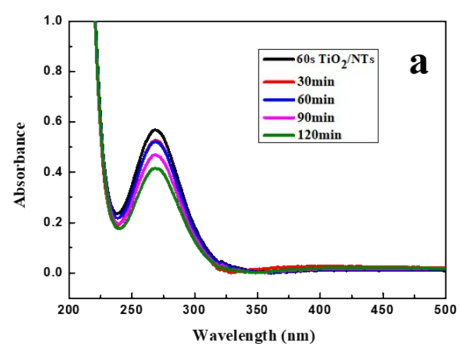

Fig.S12

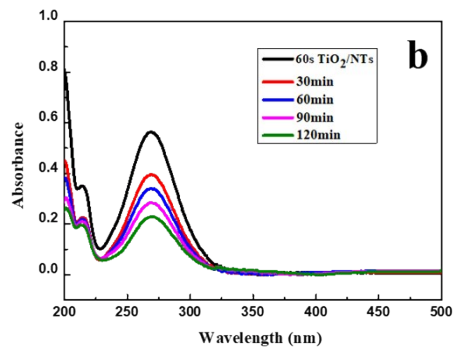

Fig.S13

(a) Photocatalytic performances of the Au/TiO<sub>2</sub> NTs degradation of NB under the irradiation of UV light after 2 h; (b) photoelectrocatalysis performances of the Au/TiO<sub>2</sub> NTs degradation of NB under the irradiation of UV light after 2 h;

Table S1 Mass fraction (%) of Au/TiO<sub>2</sub> NTs sprayed with different time

| Samples                     | Ti    | O     | Au   | C     |
|-----------------------------|-------|-------|------|-------|
| TiO <sub>2</sub> NTs        | 45.63 | 49.84 | 0    | 4.53  |
| 20s Au/TiO <sub>2</sub> NTs | 24.32 | 61.98 | 1.76 | 11.94 |
| 30s Au/TiO <sub>2</sub> NTs | 25.72 | 62.35 | 1.77 | 10.16 |
| 40s Au/TiO <sub>2</sub> NTs | 27.57 | 63.59 | 1.79 | 7.05  |
| 50s Au/TiO <sub>2</sub> NTs | 24.40 | 67.22 | 1.83 | 6.55  |
| 60s Au/TiO <sub>2</sub> NTs | 29.02 | 58.47 | 1.96 | 10.55 |
